# Supplementary material
Source: publisher figshare collection journal article supplement (https://acs.figshare.com/ndownloader/files/11443994)
Supplement: Supplementary file 1 [file 11443994]

## Sheet: WM-115 WM-266-4
Peptide	IPI	Full Gene Name	Gene	F	1/R	AVG (115/266-4)	AVG	STD DEV	RSD
R.TIVITSHPGQIVK.H [283, 295] (rank 1)	IPI00012535	DnaJ homolog subfamily A member 1	DNAJA1	0.86	0.8	0.83
K.QISQAYEVLSDAK.K [46, 58] (rank 2)	IPI00012535	DnaJ homolog subfamily A member 1	DNAJA1	0.84	1.07527	0.957634	0.893817	0.0902512	0.100973
K.LSELEDLLPSRPEVPNIIGETEEVELQEFDSTR.G [347, 379] (rank 1)	IPI00032406	DnaJ homolog subfamily A member 2	DNAJA2	0.63	0.694444	0.662222
K.EHEVFQR.D [255, 261] (rank 2)	IPI00032406	DnaJ homolog subfamily A member 2	DNAJA2	1.44	0.8	1.12
K.EYHPDKNPNAGDK.F [33, 45] (missed 1) (rank 3)	IPI00032406	DnaJ homolog subfamily A member 2	DNAJA2	0.99	1.51515	1.25258	1.0116	0.309746	0.306194
R.DGADIHSDLFISIAQALLGGTAR.A [341, 363] (rank 2)	IPI00179187	Isoform 2 of DnaJ homolog subfamily A member 3, mitochondrial	DNAJA3	0.91	0.49505	0.702525
K.NVVHQLSVTLEDLYNGVTK.K [21, 39] (rank 2)	IPI00383360	DnaJ (Hsp40) homolog, subfamily A, member 4, isoform CRA_a	DNAJA4	1.08	0.724638	0.902319
K.ETQYYDILGVK.P [32, 42] (rank 1)	IPI00465105	Isoform 2 of DnaJ homolog subfamily A member 4	DNAJA4	1	2.27273	1.63636
R.GASDEEIKR.A [13, 21] (missed 1) (rank 1)	IPI00015947	DnaJ homolog subfamily B member 1	DNAJB1	1.89	1.72414	1.80707
R.FQMTQEVVCDECPNVK.L [184, 199] (rank 2)	IPI00008454	DnaJ homolog subfamily B member 11	DNAJB11	0.85	0.763359	0.806679
K.GSLIITFDVDFPK.E [315, 327] (rank 1)	IPI00008454	DnaJ homolog subfamily B member 11	DNAJB11	1.05	0.684932	0.867466	0.837073	0.0429825	0.0513485
K.MGTPSCSR.L [391, 398] (rank 1)	IPI00014400	dnaJ homolog subfamily B member 12	DNAJB12	0.17	0.308642	0.239321
K.LYPLPSAR.A [36, 43] (rank 1)	IPI00178504	Isoform 1 of DnaJ homolog subfamily B member 14	DNAJB14	0.84	1.14943	0.994713
R.AEAGSGGPGFTFTFR.S [82, 96] (rank 1)	IPI00220102	Isoform 3 of DnaJ homolog subfamily B member 2	DNAJB2	0.85	0.512821	0.68141
R.DGSNIIYTAK.I [245, 254] (rank 1)	IPI00003848	DnaJ homolog subfamily B member 4	DNAJB4	3.88	2	2.94
R.APGPWDPLASAAGLK.E [287, 301] (rank 1)	IPI00024523	Isoform A of DnaJ homolog subfamily B member 6	DNAJB6	0.75	0.571429	0.660714
K.DSVTCSPGMVR.L [375, 385] (rank 3)	IPI00074870	DnaJ homolog subfamily C member 1	DNAJC1	0.06	0.190476	0.125238
K.ILYDILAFAK.E [438, 447] (rank 1)	IPI00293260	Isoform 1 of DnaJ homolog subfamily C member 10	DNAJC10	0.75	0.332226	0.541113
K.GGDCLTSQTR.L [266, 275] (rank 2)	IPI00293260	Isoform 1 of DnaJ homolog subfamily C member 10	DNAJC10	0.81	0.520833	0.665417
K.GVNSYPSLFIFR.S [196, 207] (rank 3)	IPI00293260	Isoform 1 of DnaJ homolog subfamily C member 10	DNAJC10	0.79	0.552486	0.671243	0.625924	0.0735065	0.117437
R.GLEMEGWEVVER.R [46, 57] (rank 2)	IPI00027984	Putative uncharacterized protein	DNAJC11	0.97	0.60241	0.786205
R.EASSEELK.A [23, 30] (rank 3)	IPI00333016	Isoform 3 of DnaJ homolog subfamily C member 11	DNAJC11	2.31	1.5873	1.94865
R.QGNAPVASGR.Y [410, 419] (rank 2)	IPI00158847	DnaJ homolog subfamily C member 14	DNAJC14	0.82	0.628931	0.724465
K.QVFQSLPK.S [34, 41] (rank 2)	IPI00304306	Mitochondrial import inner membrane translocase subunit TIM14	DNAJC19	0.74	1.04167	0.890833
K.DLLEGQAK.K [107, 114] (rank 1)	IPI00304306	Mitochondrial import inner membrane translocase subunit TIM14	DNAJC19	1.03	1	1.015
R.EAALILGVSPTANK.G [61, 74] (rank 4)	IPI00304306	Mitochondrial import inner membrane translocase subunit TIM14	DNAJC19	0.7	2.63158	1.66579	1.19054	0.416233	0.349617
K.AAGEPIKEGDNDYFTCITK.G [124, 142] (missed 1) (rank 2)	IPI00448317	DNAJC2 19 kDa protein	DNAJC2	0.16	0.0819672	0.120984
K.EHGVVPQADNATPSER.F [474, 489] (rank 2)	IPI00455199	Isoform 2 of DnaJ homolog subfamily C member 2	DNAJC2	0.53	0.367647	0.448824
K.DNFFEVFTPVFER.N [175, 187] (rank 3)	IPI00455199	Isoform 2 of DnaJ homolog subfamily C member 2	DNAJC2	0.79	0.431034	0.610517	0.52967	0.114335	0.21586
K.QIEEINEQIR.K [413, 422] (rank 2)	IPI00830108	Isoform 1 of DnaJ homolog subfamily C member 2	DNAJC2	0.4	0.240964	0.320482
K.VDPEDTNLNQDSAK.E [411, 424] (rank 1)	IPI00142716	Isoform 1 of DnaJ homolog subfamily C member 21	DNAJC21	0.76	0.952381	0.85619
R.TPQSAEEAFLLVATAYETLKDEETR.K [92, 116] (missed 1) (rank 2)	IPI00027909	Isoform 1 of DnaJ homolog subfamily C member 25	DNAJC25	0.53	0.41841	0.474205
K.LDEAEDDFKK.V [120, 129] (missed 1) (rank 2)	IPI00006713	DnaJ homolog subfamily C member 3	DNAJC3	0.16	0.273973	0.216986
K.DEKPVEAIR.V [318, 326] (rank 3)	IPI00006713	DnaJ homolog subfamily C member 3	DNAJC3	0.37	0.286533	0.328266
K.MDFTAAR.L [101, 107] (rank 1)	IPI00006713	DnaJ homolog subfamily C member 3	DNAJC3	0.4	0.497512	0.448756	0.331336	0.115915	0.349842
R.GLLSDEDLR.G [112, 120] (rank 1)	IPI00157375	DnaJ homolog subfamily C member 30	DNAJC30	3.63	1.92308	2.77654
K.YHPDKNPDNPEAADK.F [41, 55] (missed 1) (rank 1)	IPI00023780	Isoform 2 of DnaJ homolog subfamily C member 5	DNAJC5	0.68	0.617284	0.648642
K.NATSDDIKK.S [24, 32] (missed 1) (rank 2)	IPI00023780	Isoform 2 of DnaJ homolog subfamily C member 5	DNAJC5	0.48	0.961538	0.720769	0.684706	0.0510017	0.074487
R.NMYNWLLQNPK.N [203, 213] (rank 2)	IPI00184119	Isoform 2 of Putative tyrosine-protein phosphatase auxilin	DNAJC6	2.09	1.5625	1.82625
R.MDSTNADALYVR.G [204, 215] (rank 1)	IPI00329629	DnaJ homolog subfamily C member 7	DNAJC7	0.99	1.17647	1.08324
K.EYVEHTVK.E [127, 134] (rank 1)	IPI00003438	DnaJ homolog subfamily C member 8	DNAJC8	0.52	0.465116	0.492558
K.AFEAVDK.A [98, 104] (rank 3)	IPI00003438	DnaJ homolog subfamily C member 8	DNAJC8	0.13	0.862069	0.496034	0.494296	0.00245815	0.00497302
K.ELGLDEGVDSLK.A [197, 208] (rank 1)	IPI00014718	RcDNAJ9 (Fragment)	DNAJC9	0.94	1.38889	1.16444
K.GSEEELADIK.Q [121, 130] (rank 2)	IPI00154975	DnaJ homolog subfamily C member 9	DNAJC9	1.21	1.38889	1.29944
K.VSLQVHPDR.V [37, 45] (rank 1)	IPI00154975	DnaJ homolog subfamily C member 9	DNAJC9	1.1	1.96078	1.53039	1.41492	0.163305	0.115416
K.KPAAAAAPGTAEK.L [22, 34] (rank 2)	IPI00032140	Serpin H1	HSP47	0.5	0.740741	0.62037
K.HLAGLGLTEAIDK.N [319, 331] (rank 3)	IPI00032140	Serpin H1	HSP47	0.61	0.636943	0.623471
K.DLYLASVFHATAFELDTDGNPFDQDIYGR.E [344, 372] (rank 1)	IPI00032140	Serpin H1	HSP47	0.6	0.680272	0.640136	0.627993	0.0106302	0.0169273
K.HLEINPDHSIIETLR.Q [754, 768] (rank 3)	IPI00382470	Isoform 2 of Heat shock protein HSP 90-alpha	HSP90AA1	1.71	1.66667	1.68833
K.ELHINLIPNKQDR.T [196, 208] (missed 1) (rank 1)	IPI00382470	Isoform 2 of Heat shock protein HSP 90-alpha	HSP90AA1	1.87	1.53846	1.70423
R.NPDDITNEEYGEFYK.S [421, 435] (rank 2)	IPI00382470	Isoform 2 of Heat shock protein HSP 90-alpha	HSP90AA1	2.1	1.31579	1.70789
R.YYTSASGDEMVSLK.D [586, 599] (rank 4)	IPI00382470	Isoform 2 of Heat shock protein HSP 90-alpha	HSP90AA1	1.83	1.85185	1.84093	1.73535	0.0708967	0.0408545
K.STYGWTANMER.I [289, 299] (rank 2)	IPI00555957	Putative heat shock protein HSP 90-alpha A4	HSP90AA4P	0.92	1.26582	1.09291
R.YHTSQSGDEMTSLSEYVSR.M [456, 474] (rank 3)	IPI00414676	Heat shock protein HSP 90-beta	HSP90AB1	0.74	0.662252	0.701126
K.HLEINPDHPIVETLR.Q [624, 638] (rank 2)	IPI00414676	Heat shock protein HSP 90-beta	HSP90AB1	0.7	0.735294	0.717647
R.ADHGEPIGR.G [168, 176] (rank 1)	IPI00414676	Heat shock protein HSP 90-beta	HSP90AB1	1.01	0.704225	0.857113	0.758629	0.0856889	0.112952
K.GFEVIYMSEPIDEYCVQQLK.E [414, 433] (rank 1)	IPI00555565	Putative heat shock protein HSP 90-beta 4	HSP90AB4P	0.72	0.641026	0.680513
-.MSLIINTFYSNK.E [0, 11] (rank 2)	IPI00555565	Putative heat shock protein HSP 90-beta 4	HSP90AB4P	1.38	0.813008	1.0965	0.888508	0.29415	0.331061
K.GVVDSDDLPLNVSR.E [434, 447] (rank 1)	IPI00027230	HSP90B1 Endoplasmin	HSP90B1	1.05	0.591716	0.820858
R.FQSSHHPTDITSLDQYVER.M [511, 529] (rank 2)	IPI00027230	HSP90B1 Endoplasmin	HSP90B1	1.15	0.636943	0.893471	0.857165	0.0513454	0.0599014
K.SAVEDEGLK.G [550, 558] (rank 1)	IPI00304925	Heat shock 70 kDa protein 1	HSPA1	2.24	1.69492	1.96746
R.LVNHFVEEFKR.K [236, 246] (missed 1) (rank 2)	IPI00304925	Heat shock 70 kDa protein 1	HSPA1	2.57	1.75439	2.16219	2.06483	0.137699	0.0666878
K.LLQDFFDGR.D [293, 301] (rank 1)	IPI00911039	highly similar to Heat shock 70 kDa protein 1	HSPA1	1.6	1.96078	1.78039
K.TPTTILLTPER.K [98, 108] (rank 2)	IPI00011932	Heat shock 70 kDa protein 12A	HSPA12A	0.5	0.143472	0.321736
K.EPHSSDTELPK.D [319, 329] (rank 1)	IPI00299299	Heat shock 70 kDa protein 13	HSPA13	1.31	0.653595	0.981797
R.YEIDTGEETK.F [99, 108] (rank 2)	IPI00292499	Heat shock 70 kDa protein 14	HSPA14	0.22	0.176991	0.198496
K.DAGTITGLNVLR.I [160, 171] (rank 1)	IPI00007702	Heat shock-related 70 kDa protein 2	HSPA2	0.43	0.429185	0.429592
K.EIAEAYLGGK.V [129, 138] (rank 2)	IPI00007702	Heat shock-related 70 kDa protein 2	HSPA2	0.3	0.606061	0.45303
K.CQEVINWLDR.N [576, 585] (rank 3)	IPI00007702	Heat shock-related 70 kDa protein 2	HSPA2	0.52	0.390625	0.455313	0.445978	0.0142366	0.0319221
K.VEPPKEEQK.N [789, 797] (missed 1) (rank 1)	IPI00002966	Heat shock 70 kDa protein 4	HSPA4	0.86	0.653595	0.756797
K.KMDQPPQAK.K [559, 567] (missed 1) (rank 2)	IPI00002966	Heat shock 70 kDa protein 4	HSPA4	0.89	0.787402	0.838701	0.797749	0.0579145	0.0725973
K.SFYPEEVSSMVLTK.M [112, 125] (rank 4)	IPI00003865	Isoform 1 of Heat shock cognate 71 kDa protein	HSPA8	0.86	0.854701	0.85735
K.SQIHDIVLVGGSTR.I [328, 341] (rank 2)	IPI00003865	Isoform 1 of Heat shock cognate 71 kDa protein	HSPA8	0.87	0.854701	0.86235
K.QTQTFTTYSDNQPGVLIQVYEGER.A [423, 446] (rank 3)	IPI00003865	Isoform 1 of Heat shock cognate 71 kDa protein	HSPA8	1.05	0.724638	0.887319
K.HWPFMVVNDAGR.P [88, 99] (rank 1)	IPI00003865	Isoform 1 of Heat shock cognate 71 kDa protein	HSPA8	1	0.900901	0.95045	0.889368	0.0427798	0.0481014
K.ERVEAVNMAEGIIHDTETK.M [576, 594] (missed 1) (rank 4)	IPI00007765	Stress-70 protein, mitochondrial	HSPA9	0.95	0.917431	0.933716
R.RYDDPEVQK.D [126, 134] (missed 1) (rank 3)	IPI00007765	Stress-70 protein, mitochondrial	HSPA9	0.8	1.11111	0.955556
R.AQFEGIVTDLIR.R [348, 359] (rank 5)	IPI00007765	Stress-70 protein, mitochondrial	HSPA9	0.75	1.33333	1.04167
K.YAEEDRR.K [567, 573] (missed 1) (rank 2)	IPI00007765	Stress-70 protein, mitochondrial	HSPA9	1.23	0.854701	1.04235
K.ETAENYLGHTAK.N [175, 186] (rank 1)	IPI00007765	Stress-70 protein, mitochondrial	HSPA9	1.26	0.862069	1.06103	1.00686	0.0578537	0.0574593
K.LATQSNEITIPVTFESR.A [171, 187] (rank 1)	IPI00025512	Heat shock protein beta-1	HSPB1	1.42	1.21951	1.31976
K.DGVVEITGK.H [114, 122] (rank 4)	IPI00025512	Heat shock protein beta-1	HSPB1	1.4	1.47059	1.43529
R.LFDQAFGLPR.L [27, 36] (rank 3)	IPI00025512	Heat shock protein beta-1	HSPB1	1.78	1.13636	1.45818
R.VPFSLLR.G [5, 11] (rank 5)	IPI00025512	Heat shock protein beta-1	HSPB1	1.54	1.40845	1.47423
R.VSLDVNHFAPDELTVK.T [96, 111] (rank 2)	IPI00025512	Heat shock protein beta-1	HSPB1	1.89	1.19048	1.54024	1.44554	0.0804316	0.0556412
R.TEHSPFHEHVLGALCSLVTDFPQGVR.E [328, 353] (rank 3)	IPI00100748	highly similar to Hsp70-binding protein 1	HSPBP1	0.61	1.06383	0.836915
K.LLQTCFSSPADDSMDR.- [389, 404] (rank 2)	IPI00100748	highly similar to Hsp70-binding protein 1	HSPBP1	0.79	0.900901	0.84545
R.YLEAGAAGLR.W [198, 207] (rank 1)	IPI00100748	highly similar to Hsp70-binding protein 1	HSPBP1	0.6	1.21951	0.909756	0.86404	0.0398202	0.0460861
R.SYGNSSDSR.Y [50, 58] (rank 2)	IPI00428100	Selenoprotein K	HSPC030	0.51	0.714286	0.612143
R.GPPGNPPR.R [64, 71] (rank 1)	IPI00428100	Selenoprotein K	HSPC030	0.89	0.628931	0.759465	0.685804	0.104173	0.151899
R.EQISLYPEVK.G [41, 50] (rank 2)	IPI00023064	NADH dehydrogenase [ubiquinone] 1 alpha subcomplex assembly factor 4	HSPC125	0.56	0.473934	0.516967
R.HPSTNSLLR.E [32, 40] (rank 1)	IPI00023064	NADH dehydrogenase [ubiquinone] 1 alpha subcomplex assembly factor 4	HSPC125	0.65	0.460829	0.555415	0.536191	0.0271868	0.0507036
R.CIPALDSLTPANEDQK.I [131, 146] (rank 1)	IPI00076042	Short heat shock protein 60 Hsp60s2	HSPD1	0.63	0.769231	0.699615
K.DDAMLLK.G [37, 43] (rank 2)	IPI00076042	Short heat shock protein 60 Hsp60s2	HSPD1	0.93	0.497512	0.713756
K.VGEVIVTK.D [29, 36] (rank 4)	IPI00076042	Short heat shock protein 60 Hsp60s2	HSPD1	0.74	0.714286	0.727143
R.VTDALNATR.A [105, 113] (rank 3)	IPI00076042	Short heat shock protein 60 Hsp60s2	HSPD1	0.74	0.819672	0.779836	0.730088	0.0350183	0.0479646
K.CEFQDAYVLLSEK.K [236, 248] (rank 2)	IPI00784154	60 kDa heat shock protein, mitochondrial	HSPD1	0.61	0.653595	0.631797
R.KPLVIIAEDVDGEALSTLVLNR.L [268, 289] (rank 1)	IPI00784154	60 kDa heat shock protein, mitochondrial	HSPD1	0.63	0.641026	0.635513
K.DMAIATGGAVFGEEGLTLNLEDVQPHDLGK.V [314, 343] (rank 4)	IPI00784154	60 kDa heat shock protein, mitochondrial	HSPD1	0.65	0.649351	0.649675
K.NAGVEGSLIVEK.I [481, 492] (rank 3)	IPI00784154	60 kDa heat shock protein, mitochondrial	HSPD1	0.67	0.657895	0.663947	0.645233	0.0146624	0.0227242
K.VLLPEYGGTK.V [70, 79] (rank 1)	IPI00220362	10 kDa heat shock protein, mitochondrial	HSPE1	0.9	0.671141	0.78557
K.NQQITHANNTVSNFK.R [53, 67] (rank 2)	IPI00218993	Isoform Beta of Heat shock protein 105 kDa	HSPH1	0.75	0.892857	0.821429				Average RSD
K.VEDVSAVEIVGGATR.I [331, 345] (rank 1)	IPI00218993	Isoform Beta of Heat shock protein 105 kDa	HSPH1	1.06	0.793651	0.926825	0.874127	0.0745268	0.0852586	0.110551

## Sheet: IGR-39 IGR-37
Peptide	IPI	Gene Full Name	Gene	F	1/R	AVG (IGR-39/IGR-37)	AVG	STD DEV	RSD
K.QISQAYEVLSDAK.K [46, 58] (rank 2)	IPI00012535	DnaJ homolog subfamily A member 1	DNAJA1	1.06	0.952381	1.00619
R.TIVITSHPGQIVK.H [283, 295] (rank 1)	IPI00012535	DnaJ homolog subfamily A member 1	DNAJA1	1.25	0.671141	0.96057	0.98338	0.0322582	0.0328034
K.EYHPDKNPNAGDK.F [33, 45] (missed 1) (rank 3)	IPI00032406	DnaJ homolog subfamily A member 2	DNAJA2	0.57	0.219298	0.394649
K.EHEVFQR.D [255, 261] (rank 2)	IPI00032406	DnaJ homolog subfamily A member 2	DNAJA2	1.25	0.628931	0.939465
K.LSELEDLLPSRPEVPNIIGETEEVELQEFDSTR.G [347, 379] (rank 1)	IPI00032406	DnaJ homolog subfamily A member 2	DNAJA2		0.757576	0.757576	0.69723	0.277376	0.397825
K.NVVHQLSVTLEDLYNGVTK.K [21, 39] (rank 2)	IPI00383360	DnaJ (Hsp40) homolog, subfamily A, member 4, isoform CRA_a	DNAJA4	1.68	5.55556	3.61778
R.GASDEEIKR.A [13, 21] (missed 1) (rank 1)	IPI00015947	DnaJ homolog subfamily B member 1	DNAJB1	2.24	1.44928	1.84464
R.FQMTQEVVCDECPNVK.L [184, 199] (rank 2)	IPI00008454	DnaJ homolog subfamily B member 11	DNAJB11	1.04	0.403226	0.721613
K.MGTPSCSR.L [391, 398] (rank 1)	IPI00014400	dnaJ homolog subfamily B member 12	DNAJB12	1.55	0.826446	1.18822
K.DAGDEDLKK.A [117, 125] (missed 1) (rank 3)	IPI00178504	Isoform 1 of DnaJ homolog subfamily B member 14	DNAJB14	1.76	0.657895	1.20895
R.AEAGSGGPGFTFTFR.S [82, 96] (rank 1)	IPI00220102	Isoform 3 of DnaJ homolog subfamily B member 2	DNAJB2	2.89	0.943396	1.9167
R.DGSNIIYTAK.I [245, 254] (rank 1)	IPI00003848	DnaJ homolog subfamily B member 4	DNAJB4	2.26	2.5	2.38
R.EALCGCSINVPTLDGR.N [259, 274] (rank 2)	IPI00003848	DnaJ homolog subfamily B member 4	DNAJB4	2.27	0.840336	1.55517	1.96758	0.583244	0.296427
R.APGPWDPLASAAGLK.E [287, 301] (rank 1)	IPI00024523	Isoform A of DnaJ homolog subfamily B member 6	DNAJB6	1.37	0.373134	0.871567
K.DSVTCSPGMVR.L [375, 385] (rank 3)	IPI00074870	DnaJ homolog subfamily C member 1	DNAJC1	2.64	1.16279	1.9014
K.GGDCLTSQTR.L [266, 275] (rank 2)	IPI00293260	Isoform 1 of DnaJ homolog subfamily C member 10	DNAJC10	1.48	0.581395	1.0307
K.ILYDILAFAK.E [438, 447] (rank 1)	IPI00293260	Isoform 1 of DnaJ homolog subfamily C member 10	DNAJC10	1.16	0.763359	0.961679	0.996189	0.0488033	0.04899
R.EASSEELK.A [23, 30] (rank 3)	IPI00333016	Isoform 3 of DnaJ homolog subfamily C member 11	DNAJC11	1.29	0.884956	1.08748
R.GLEMEGWEVVER.R [46, 57] (rank 2)	IPI00027984	Putative uncharacterized protein	DNAJC11	1.02	0.552486	0.786243
R.QGNAPVASGR.Y [410, 419] (rank 2)	IPI00158847	DnaJ homolog subfamily C member 14	DNAJC14	1.34	0.819672	1.07984
R.EAGLILGVSPSAGK.A [95, 108] (rank 4)	IPI00001649	DnaJ homolog subfamily C member 15	DNAJC15	11.29		11.29
R.EAALILGVSPTANK.G [61, 74] (rank 4)	IPI00304306	Mitochondrial import inner membrane translocase subunit TIM14	DNAJC19	0.04	0.193798	0.116899
K.QIEEINEQIR.K [413, 422] (rank 2)	IPI00830108	Isoform 1 of DnaJ homolog subfamily C member 2	DNAJC2	1.16	0.746269	0.953134
K.EHGVVPQADNATPSER.F [474, 489] (rank 2)	IPI00455199	Isoform 2 of DnaJ homolog subfamily C member 2	DNAJC2	0.83	0.787402	0.808701
K.IAEAVPGR.T [526, 533] (rank 1)	IPI00455199	Isoform 2 of DnaJ homolog subfamily C member 2	DNAJC2	1.45	0.925926	1.18796	0.983266	0.191418	0.194676
R.GTAITHALTSASTLCQVEPVGR.W [11, 32] (rank 4)	IPI00448317	DNAJC2 19 kDa protein	DNAJC2	1.11	0.704225	0.907113
K.NQDHYAVLGLGHVR.Y [85, 98] (rank 3)	IPI00448317	DNAJC2 19 kDa protein	DNAJC2		0.925926	0.925926	0.916519	0.013303	0.0145147
K.VDPEDTNLNQDSAK.E [411, 424] (rank 1)	IPI00142716	Isoform 1 of DnaJ homolog subfamily C member 21	DNAJC21	1.12	1.47059	1.29529
R.EAGEDEEGFLSK.L [461, 472] (rank 1)	IPI00294610	Isoform 1 of DnaJ homolog subfamily A member 3, mitochondrial	DNAJA3	1.15	0.438596	0.794298
K.MDFTAAR.L [101, 107] (rank 1)	IPI00006713	DnaJ homolog subfamily C member 3	DNAJC3	0.44	0.546448	0.493224
K.NATSDDIKK.S [24, 32] (missed 1) (rank 2)	IPI00023780	Isoform 2 of DnaJ homolog subfamily C member 5	DNAJC5	0.46	0.534759	0.49738
K.YHPDKNPDNPEAADK.F [41, 55] (missed 1) (rank 1)	IPI00023780	Isoform 2 of DnaJ homolog subfamily C member 5	DNAJC5	0.68	0.591716	0.635858	0.566619	0.097919	0.172813
R.NMYNWLLQNPK.N [203, 213] (rank 2)	IPI00184119	Isoform 2 of Putative tyrosine-protein phosphatase auxilin	DNAJC6	1.14	1.16279	1.1514
R.MDSTNADALYVR.G [204, 215] (rank 1)	IPI00329629	DnaJ homolog subfamily C member 7	DNAJC7	1.04	1.28205	1.16103
K.AVQFFVQALR.M [228, 237] (rank 2)	IPI00329629	DnaJ homolog subfamily C member 7	DNAJC7	1.62	0.980392	1.3002	1.23061	0.0984084	0.0799671
K.EYVEHTVK.E [127, 134] (rank 1)	IPI00003438	DnaJ homolog subfamily C member 8	DNAJC8	1	0.952381	0.97619
K.GSEEELADIK.Q [121, 130] (rank 2)	IPI00154975	DnaJ homolog subfamily C member 9	DNAJC9	2.54	1.78571	2.16286
K.ELGLDEGVDSLK.A [197, 208] (rank 1)	IPI00014718	RcDNAJ9 (Fragment)	DNAJC9	2.32	2.17391	2.24696
K.KPAAAAAPGTAEK.L [22, 34] (rank 2)	IPI00032140	Serpin H1	HSP47	12.87	10	11.435
K.HLAGLGLTEAIDK.N [319, 331] (rank 3)	IPI00032140	Serpin H1	HSP47	5.71	3.57143	4.64071	8.03786	4.80429	0.597707
K.ELHINLIPNKQDR.T [196, 208] (missed 1) (rank 1)	IPI00382470	Isoform 2 of Heat shock protein HSP 90-alpha	HSP90AA1	1.2	0.625	0.9125
R.NPDDITNEEYGEFYK.S [421, 435] (rank 2)	IPI00382470	Isoform 2 of Heat shock protein HSP 90-alpha	HSP90AA1	1.25	0.847458	1.04873
R.YYTSASGDEMVSLK.D [586, 599] (rank 4)	IPI00382470	Isoform 2 of Heat shock protein HSP 90-alpha	HSP90AA1	1.22	1.0989	1.15945
K.HLEINPDHSIIETLR.Q [754, 768] (rank 3)	IPI00382470	Isoform 2 of Heat shock protein HSP 90-alpha	HSP90AA1	1.42	0.719424	1.06971	1.0476	0.102067	0.0974292
K.STYGWTANMER.I [289, 299] (rank 2)	IPI00555957	Putative heat shock protein HSP 90-alpha A4	HSP90AA4P	0.53	0.512821	0.52141
R.ADHGEPIGR.G [168, 176] (rank 1)	IPI00414676	Heat shock protein HSP 90-beta	HSP90AB1	0.93	0.512821	0.72141
R.YHTSQSGDEMTSLSEYVSR.M [456, 474] (rank 3)	IPI00414676	Heat shock protein HSP 90-beta	HSP90AB1	0.73	0.699301	0.71465
K.HLEINPDHPIVETLR.Q [624, 638] (rank 2)	IPI00414676	Heat shock protein HSP 90-beta	HSP90AB1	0.97	0.438596	0.704298	0.713453	0.00861862	0.0120801
-.MSLIINTFYSNK.E [0, 11] (rank 2)	IPI00555565	Putative heat shock protein HSP 90-beta 4	HSP90AB4P	0.58	0.806452	0.693226
K.GFEVIYMSEPIDEYCVQQLK.E [414, 433] (rank 1)	IPI00555565	Putative heat shock protein HSP 90-beta 4	HSP90AB4P	0.67	0.617284	0.643642	0.668434	0.0350611	0.0524526
K.GVVDSDDLPLNVSR.E [434, 447] (rank 1)	IPI00027230	HSP90B1 Endoplasmin	HSP90B1	0.67	0.460829	0.565415
R.FQSSHHPTDITSLDQYVER.M [511, 529] (rank 2)	IPI00027230	HSP90B1 Endoplasmin	HSP90B1	0.72	0.390625	0.555312	0.560364	0.00714337	0.0127477
K.LLQDFFDGR.D [293, 301] (rank 1)	IPI00911039	highly similar to Heat shock 70 kDa protein 1	HSPA1	1.21	1.19048	1.20024
R.LVNHFVEEFKR.K [236, 246] (missed 1) (rank 2)	IPI00304925	Heat shock 70 kDa protein 1	HSPA1	1.42	0.952381	1.18619
K.SAVEDEGLK.G [550, 558] (rank 1)	IPI00304925	Heat shock 70 kDa protein 1	HSPA1	1.13	1.26582	1.19791	1.19478	0.00752915	0.00630171
R.YEIDTGEETK.F [99, 108] (rank 2)	IPI00292499	Heat shock 70 kDa protein 14	HSPA14	0.86	1.33333	1.09667
R.VLSTNTDDNIGGAHFTETLAQYLASEFQR.S [216, 244] (rank 1)	IPI00292499	Heat shock 70 kDa protein 14	HSPA14	1.72	0.909091	1.31455	1.20561	0.154064	0.127789
K.EIAEAYLGGK.V [129, 138] (rank 2)	IPI00007702	Heat shock-related 70 kDa protein 2	HSPA2	0.95	2	1.475
K.DAGTITGLNVLR.I [160, 171] (rank 1)	IPI00007702	Heat shock-related 70 kDa protein 2	HSPA2	1.46	1.36986	1.41493
K.CQEVINWLDR.N [576, 585] (rank 3)	IPI00007702	Heat shock-related 70 kDa protein 2	HSPA2	1.93	1.16279	1.5464	1.47878	0.0658132	0.0445052
K.KMDQPPQAK.K [559, 567] (missed 1) (rank 2)	IPI00002966	Heat shock 70 kDa protein 4	HSPA4	1	0.689655	0.844828
K.VEPPKEEQK.N [789, 797] (missed 1) (rank 1)	IPI00002966	Heat shock 70 kDa protein 4	HSPA4	1.35	0.775194	1.0626	0.953712	0.153986	0.16146
K.HWPFMVVNDAGR.P [88, 99] (rank 1)	IPI00003865	Isoform 1 of Heat shock cognate 71 kDa protein	HSPA8	1.21	0.505051	0.857525
K.SFYPEEVSSMVLTK.M [112, 125] (rank 4)	IPI00003865	Isoform 1 of Heat shock cognate 71 kDa protein	HSPA8	1.22	0.571429	0.895714
K.SQIHDIVLVGGSTR.I [328, 341] (rank 2)	IPI00003865	Isoform 1 of Heat shock cognate 71 kDa protein	HSPA8	1.04	0.793651	0.916825
K.QTQTFTTYSDNQPGVLIQVYEGER.A [423, 446] (rank 3)	IPI00003865	Isoform 1 of Heat shock cognate 71 kDa protein	HSPA8	0.88	0.740741	0.81037	0.870109	0.04678	0.0537634
R.RYDDPEVQK.D [126, 134] (missed 1) (rank 3)	IPI00007765	Stress-70 protein, mitochondrial	HSPA9	0.76	0.877193	0.818596
K.ETAENYLGHTAK.N [175, 186] (rank 1)	IPI00007765	Stress-70 protein, mitochondrial	HSPA9	1.09	0.735294	0.912647
R.AQFEGIVTDLIR.R [348, 359] (rank 5)	IPI00007765	Stress-70 protein, mitochondrial	HSPA9	1.13	0.735294	0.932647
K.ERVEAVNMAEGIIHDTETK.M [576, 594] (missed 1) (rank 4)	IPI00007765	Stress-70 protein, mitochondrial	HSPA9	1.02	0.75188	0.88594	0.887458	0.0497351	0.0560423
R.VPFSLLR.G [5, 11] (rank 5)	IPI00025512	Heat shock protein beta-1	HSPB1	2.52	2.7027	2.61135
R.LFDQAFGLPR.L [27, 36] (rank 3)	IPI00025512	Heat shock protein beta-1	HSPB1	3.32	2.22222	2.77111
R.VSLDVNHFAPDELTVK.T [96, 111] (rank 2)	IPI00025512	Heat shock protein beta-1	HSPB1	2.29	4.54545	3.41773
K.DGVVEITGK.H [114, 122] (rank 4)	IPI00025512	Heat shock protein beta-1	HSPB1	2.7	3.84615	3.27308
K.LATQSNEITIPVTFESR.A [171, 187] (rank 1)	IPI00025512	Heat shock protein beta-1	HSPB1	2.64	2.27273	2.45636	2.90593	0.419463	0.144347
R.YLEAGAAGLR.W [198, 207] (rank 1)	IPI00100748	highly similar to Hsp70-binding protein 1	HSPBP1	2.02	1.14943	1.58471
R.TEHSPFHEHVLGALCSLVTDFPQGVR.E [328, 353] (rank 3)	IPI00100748	highly similar to Hsp70-binding protein 1	HSPBP1	2.7	0.961538	1.83077
K.LLQTCFSSPADDSMDR.- [389, 404] (rank 2)	IPI00100748	highly similar to Hsp70-binding protein 1	HSPBP1	2.28	0.806452	1.54323	1.6529	0.155427	0.0940331
R.SYGNSSDSR.Y [50, 58] (rank 2)	IPI00428100	Selenoprotein K	HSPC030	0.73	0.268097	0.499048
R.HPSTNSLLR.E [32, 40] (rank 1)	IPI00023064	NADH dehydrogenase [ubiquinone] 1 alpha subcomplex assembly factor 4	HSPC125	0.36	0.117509	0.238754
R.EQISLYPEVK.G [41, 50] (rank 2)	IPI00023064	NADH dehydrogenase [ubiquinone] 1 alpha subcomplex assembly factor 4	HSPC125	0.21	0.0320307	0.121015	0.179885	0.0832541	0.462819
K.CEFQDAYVLLSEK.K [236, 248] (rank 2)	IPI00784154	60 kDa heat shock protein, mitochondrial	HSPD1	0.64	0.564972	0.602486
R.KPLVIIAEDVDGEALSTLVLNR.L [268, 289] (rank 1)	IPI00784154	60 kDa heat shock protein, mitochondrial	HSPD1	0.67	0.271003	0.470501
K.DMAIATGGAVFGEEGLTLNLEDVQPHDLGK.V [314, 343] (rank 4)	IPI00784154	60 kDa heat shock protein, mitochondrial	HSPD1	0.78	0.60241	0.691205
K.NAGVEGSLIVEK.I [481, 492] (rank 3)	IPI00784154	60 kDa heat shock protein, mitochondrial	HSPD1	0.74	0.5	0.62	0.596048	0.0920723	0.154471
K.VGEVIVTK.D [29, 36] (rank 4)	IPI00076042	Short heat shock protein 60 Hsp60s2	HSPD1	0.47	0.787402	0.628701
K.DDAMLLK.G [37, 43] (rank 2)	IPI00076042	Short heat shock protein 60 Hsp60s2	HSPD1	0.73	0.478469	0.604234
R.VTDALNATR.A [105, 113] (rank 3)	IPI00076042	Short heat shock protein 60 Hsp60s2	HSPD1	0.62	0.526316	0.573158
R.CIPALDSLTPANEDQK.I [131, 146] (rank 1)	IPI00076042	Short heat shock protein 60 Hsp60s2	HSPD1	0.92	0.348432	0.634216	0.610077	0.027849	0.0456483
K.VLLPEYGGTK.V [70, 79] (rank 1)	IPI00220362	10 kDa heat shock protein, mitochondrial	HSPE1	0.63	0.446429	0.538214
K.NQQITHANNTVSNFK.R [53, 67] (rank 2)	IPI00218993	Isoform Beta of Heat shock protein 105 kDa	HSPH1	0.73	1.14943	0.939713				Average RSD
K.VEDVSAVEIVGGATR.I [331, 345] (rank 1)	IPI00218993	Isoform Beta of Heat shock protein 105 kDa	HSPH1	1.14	0.757576	0.948788	0.94425	0.00641716	0.00679604	0.134736

## Sheet: WM-793 1205Lu
Peptide	IPI	Gene Full Name	Gene	F	1/R	AVG (WM-793/1205Lu)	AVG	STD DEV	RSD
K.QISQAYEVLSDAK.K [46, 58] (rank 2)	IPI00012535	DnaJ homolog subfamily A member 1	DNAJA1	1.26	1.26582	1.26291
R.TIVITSHPGQIVK.H [283, 295] (rank 1)	IPI00012535	DnaJ homolog subfamily A member 1	DNAJA1	1.73	1.17647	1.45324	1.35807	0.134579	0.0990958
K.EYHPDKNPNAGDK.F [33, 45] (missed 1) (rank 3)	IPI00032406	DnaJ homolog subfamily A member 2	DNAJA2	1.18	2.43902	1.80951
K.EHEVFQR.D [255, 261] (rank 2)	IPI00032406	DnaJ homolog subfamily A member 2	DNAJA2	1.76	1.35135	1.55568	1.68259	0.17949	0.106674
R.DGADIHSDLFISIAQALLGGTAR.A [341, 363] (rank 2)	IPI00179187	Isoform 2 of DnaJ homolog subfamily A member 3, mitochondrial	DNAJA3	3.17	1.35135	2.26068
K.ETQYYDILGVK.P [32, 42] (rank 1)	IPI00465105	Isoform 2 of DnaJ homolog subfamily A member 4	DNAJA4	0.66	1.2987	0.979351
K.NVVHQLSVTLEDLYNGVTK.K [21, 39] (rank 2)	IPI00383360	DnaJ (Hsp40) homolog, subfamily A, member 4, isoform CRA_a	DNAJA4	1.11	0.657895	0.883947
R.GASDEEIKR.A [13, 21] (missed 1) (rank 1)	IPI00015947	DnaJ homolog subfamily B member 1	DNAJB1	2.98	2.43902	2.70951
R.FQMTQEVVCDECPNVK.L [184, 199] (rank 2)	IPI00008454	DnaJ homolog subfamily B member 11	DNAJB11	1.87	1.69492	1.78246
K.GSLIITFDVDFPK.E [315, 327] (rank 1)	IPI00008454	DnaJ homolog subfamily B member 11	DNAJB11		1.81818	1.81818	1.80032	0.0252608	0.0140313
K.LYPLPSAR.A [36, 43] (rank 1)	IPI00178504	Isoform 1 of DnaJ homolog subfamily B member 14	DNAJB14	1.11	1.17647	1.14324
R.DGSNIIYTAK.I [245, 254] (rank 1)	IPI00003848	DnaJ homolog subfamily B member 4	DNAJB4	1.19	1.78571	1.48786
R.APGPWDPLASAAGLK.E [287, 301] (rank 1)	IPI00024523	Isoform A of DnaJ homolog subfamily B member 6	DNAJB6	3.3	1.69492	2.49746
K.DSVTCSPGMVR.L [375, 385] (rank 3)	IPI00074870	DnaJ homolog subfamily C member 1	DNAJC1	0.97	1.1236	1.0468
K.GVNSYPSLFIFR.S [196, 207] (rank 3)	IPI00293260	Isoform 1 of DnaJ homolog subfamily C member 10	DNAJC10	1	0.699301	0.84965
K.GGDCLTSQTR.L [266, 275] (rank 2)	IPI00293260	Isoform 1 of DnaJ homolog subfamily C member 10	DNAJC10	1.2	0.689655	0.944828
K.ILYDILAFAK.E [438, 447] (rank 1)	IPI00293260	Isoform 1 of DnaJ homolog subfamily C member 10	DNAJC10	0.91	0.510204	0.710102	0.83486	0.11806	0.141413
R.EASSEELK.A [23, 30] (rank 3)	IPI00333016	Isoform 3 of DnaJ homolog subfamily C member 11	DNAJC11	0.49	0.2	0.345
R.LHLFASEQR.E [178, 186] (rank 2)	IPI00307259	DnaJ homolog subfamily C member 13	DNAJC11	1.08	1.23457	1.15728
R.GLEMEGWEVVER.R [46, 57] (rank 2)	IPI00027984	Putative uncharacterized protein	DNAJC11	1.41	0.869565	1.13978
K.DLLETTTK.H [141, 148] (rank 3)	IPI00001649	DnaJ homolog subfamily C member 15	DNAJC15	1.68	3.44828	2.56414
K.AAELAVQNEVGLVDNPLK.I [225, 242] (rank 1)	IPI00018798	DnaJ homolog subfamily C member 17	DNAJC17	4.7	1.31579	3.00789
R.EAALILGVSPTANK.G [61, 74] (rank 4)	IPI00304306	Mitochondrial import inner membrane translocase subunit TIM14	DNAJC19	1.2	1.28205	1.24103
K.DLLEGQAK.K [107, 114] (rank 1)	IPI00304306	Mitochondrial import inner membrane translocase subunit TIM14	DNAJC19	1.08		1.08	1.16051	0.113862	0.0981138
K.QIEEINEQIR.K [413, 422] (rank 2)	IPI00830108	Isoform 1 of DnaJ homolog subfamily C member 2	DNAJC2	1.93	1.5625	1.74625
K.DNFFEVFTPVFER.N [175, 187] (rank 3)	IPI00455199	Isoform 2 of DnaJ homolog subfamily C member 2	DNAJC2	1.76	1.19048	1.47524
K.EHGVVPQADNATPSER.F [474, 489] (rank 2)	IPI00455199	Isoform 2 of DnaJ homolog subfamily C member 2	DNAJC2	3.55	1.49254	2.52127	1.91425	0.542875	0.283597
K.AAGEPIKEGDNDYFTCITK.G [124, 142] (missed 1) (rank 2)	IPI00448317	DNAJC2 19 kDa protein	DNAJC2	4.18	2.7027	3.44135
R.DASEEELKK.A [12, 20] (missed 1) (rank 2)	IPI00142716	Isoform 1 of DnaJ homolog subfamily C member 21	DNAJC21	0.94	1.49254	1.21627
K.VDPEDTNLNQDSAK.E [411, 424] (rank 1)	IPI00142716	Isoform 1 of DnaJ homolog subfamily C member 21	DNAJC21	0.53	0.492611	0.511305	0.863787	0.498484	0.577092
R.TPQSAEEAFLLVATAYETLKDEETR.K [92, 116] (missed 1) (rank 2)	IPI00027909	Isoform 1 of DnaJ homolog subfamily C member 25	DNAJC25	2.15	0.840336	1.49517
K.MDFTAAR.L [101, 107] (rank 1)	IPI00006713	DnaJ homolog subfamily C member 3	DNAJC3	0.47	0.917431	0.693716
K.LDEAEDDFKK.V [120, 129] (missed 1) (rank 2)	IPI00006713	DnaJ homolog subfamily C member 3	DNAJC3	0.6	0.537634	0.568817	0.631266	0.0883165	0.139904
R.GLLSDEDLR.G [112, 120] (rank 1)	IPI00157375	DnaJ homolog subfamily C member 30	DNAJC30	2.39	1.44928	1.91964
K.NATSDDIKK.S [24, 32] (missed 1) (rank 2)	IPI00023780	Isoform 2 of DnaJ homolog subfamily C member 5	DNAJC5	1.34	0.793651	1.06683
R.NMYNWLLQNPK.N [203, 213] (rank 2)	IPI00184119	Isoform 2 of Putative tyrosine-protein phosphatase auxilin	DNAJC6	0.49	0.333333	0.411667
R.MDSTNADALYVR.G [204, 215] (rank 1)	IPI00329629	DnaJ homolog subfamily C member 7	DNAJC7	1.53	1.75439	1.64219
K.AVQFFVQALR.M [228, 237] (rank 2)	IPI00329629	DnaJ homolog subfamily C member 7	DNAJC7	1.41	2.7027	2.05635	1.84927	0.292854	0.158362
K.VSLQVHPDR.V [37, 45] (rank 1)	IPI00154975	DnaJ homolog subfamily C member 9	DNAJC9	1.03	0.869565	0.949783
K.ELGLDEGVDSLK.A [197, 208] (rank 1)	IPI00014718	RcDNAJ9 (Fragment)	DNAJC9	0.9	0.833333	0.866667	0.908225	0.0587718	0.0647107
K.KPAAAAAPGTAEK.L [22, 34] (rank 2)	IPI00032140	Serpin H1	HSP47	4.44	2.94118	3.69059
K.HLAGLGLTEAIDK.N [319, 331] (rank 3)	IPI00032140	Serpin H1	HSP47	2.71	2.04082	2.37541
K.DLYLASVFHATAFELDTDGNPFDQDIYGR.E [344, 372] (rank 1)	IPI00032140	Serpin H1	HSP47	1.84	1.44928	1.64464	2.57021	1.03679	0.403388
K.ELHINLIPNKQDR.T [196, 208] (missed 1) (rank 1)	IPI00382470	Isoform 2 of Heat shock protein HSP 90-alpha	HSP90AA1	1.32	0.653595	0.986797
R.NPDDITNEEYGEFYK.S [421, 435] (rank 2)	IPI00382470	Isoform 2 of Heat shock protein HSP 90-alpha	HSP90AA1	1.04	0.657895	0.848947
R.YYTSASGDEMVSLK.D [586, 599] (rank 4)	IPI00382470	Isoform 2 of Heat shock protein HSP 90-alpha	HSP90AA1	0.94	1.0101	0.975051
K.HLEINPDHSIIETLR.Q [754, 768] (rank 3)	IPI00382470	Isoform 2 of Heat shock protein HSP 90-alpha	HSP90AA1	1.12	0.909091	1.01455	0.956335	0.0734819	0.076837
R.DLIMDNCEELIPEYLNFIR.G [171, 189] (rank 1)	IPI00555957	Putative heat shock protein HSP 90-alpha A4	HSP90AA4P	1.33	1.38889	1.35944
R.ADHGEPIGR.G [168, 176] (rank 1)	IPI00414676	Heat shock protein HSP 90-beta	HSP90AB1	2.31	1.03093	1.67046
R.YHTSQSGDEMTSLSEYVSR.M [456, 474] (rank 3)	IPI00414676	Heat shock protein HSP 90-beta	HSP90AB1	1.58	1.2987	1.43935
K.HLEINPDHPIVETLR.Q [624, 638] (rank 2)	IPI00414676	Heat shock protein HSP 90-beta	HSP90AB1	1.79	1.33333	1.56167
K.DLVVLLFETALLSSGFSLEDPQTHSNR.I [652, 678] (rank 4)	IPI00414676	Heat shock protein HSP 90-beta	HSP90AB1	1.91	2.27273	2.09136	1.69071	0.283294	0.167559
-.MSLIINTFYSNK.E [0, 11] (rank 2)	IPI00555565	Putative heat shock protein HSP 90-beta 4	HSP90AB4P	1.22	0.552486	0.886243
K.GFEVIYMSEPIDEYCVQQLK.E [414, 433] (rank 1)	IPI00555565	Putative heat shock protein HSP 90-beta 4	HSP90AB4P	1.45	1.47059	1.46029	1.17327	0.405915	0.34597
K.GVVDSDDLPLNVSR.E [434, 447] (rank 1)	IPI00027230	HSP90B1 Endoplasmin	HSP90B1	1.43	0.75188	1.09094
R.FQSSHHPTDITSLDQYVER.M [511, 529] (rank 2)	IPI00027230	HSP90B1 Endoplasmin	HSP90B1	1.46	0.847458	1.15373	1.12233	0.0443985	0.0395591
K.LLQDFFDGR.D [293, 301] (rank 1)	IPI00911039	highly similar to Heat shock 70 kDa protein 1	HSPA1	1.1	1.44928	1.27464
R.LVNHFVEEFKR.K [236, 246] (missed 1) (rank 2)	IPI00304925	Heat shock 70 kDa protein 1	HSPA1	1.48	1.28205	1.38103
K.SAVEDEGLK.G [550, 558] (rank 1)	IPI00304925	Heat shock 70 kDa protein 1	HSPA1	1.13	1.38889	1.25944	1.30504	0.066246	0.0507618
K.TPTTILLTPER.K [98, 108] (rank 2)	IPI00011932	Heat shock 70 kDa protein 12A	HSPA12A	0.92	0.28169	0.600845
R.YEIDTGEETK.F [99, 108] (rank 2)	IPI00292499	Heat shock 70 kDa protein 14	HSPA14	1.8	2.43902	2.11951
K.EIAEAYLGGK.V [129, 138] (rank 2)	IPI00007702	Heat shock-related 70 kDa protein 2	HSPA2	0.92	2.08333	1.50167
K.DAGTITGLNVLR.I [160, 171] (rank 1)	IPI00007702	Heat shock-related 70 kDa protein 2	HSPA2	1.35	1.38889	1.36944
K.CQEVINWLDR.N [576, 585] (rank 3)	IPI00007702	Heat shock-related 70 kDa protein 2	HSPA2	1.67	1.11111	1.39056	1.42056	0.0710329	0.0500036
K.VEPPKEEQK.N [789, 797] (missed 1) (rank 1)	IPI00002966	Heat shock 70 kDa protein 4	HSPA4	4.67	1.72414	3.19707
K.HWPFMVVNDAGR.P [88, 99] (rank 1)	IPI00003865	Isoform 1 of Heat shock cognate 71 kDa protein	HSPA8	1.65	1.23457	1.44228
K.SFYPEEVSSMVLTK.M [112, 125] (rank 4)	IPI00003865	Isoform 1 of Heat shock cognate 71 kDa protein	HSPA8	1.7	1.42857	1.56429
K.SQIHDIVLVGGSTR.I [328, 341] (rank 2)	IPI00003865	Isoform 1 of Heat shock cognate 71 kDa protein	HSPA8	1.2	1.23457	1.21728
K.QTQTFTTYSDNQPGVLIQVYEGER.A [423, 446] (rank 3)	IPI00003865	Isoform 1 of Heat shock cognate 71 kDa protein	HSPA8	1.59	1.07527	1.33263	1.38912	0.14858	0.106959
R.RYDDPEVQK.D [126, 134] (missed 1) (rank 3)	IPI00007765	Stress-70 protein, mitochondrial	HSPA9	1.9	3.0303	2.46515
K.ETAENYLGHTAK.N [175, 186] (rank 1)	IPI00007765	Stress-70 protein, mitochondrial	HSPA9	2.93	2	2.465
R.AQFEGIVTDLIR.R [348, 359] (rank 5)	IPI00007765	Stress-70 protein, mitochondrial	HSPA9	2.03	2	2.015
K.ERVEAVNMAEGIIHDTETK.M [576, 594] (missed 1) (rank 4)	IPI00007765	Stress-70 protein, mitochondrial	HSPA9	2.12	1.92308	2.02154	2.24167	0.257978	0.115083
R.VPFSLLR.G [5, 11] (rank 5)	IPI00025512	Heat shock protein beta-1	HSPB1	0.99	0.917431	0.953716
R.LFDQAFGLPR.L [27, 36] (rank 3)	IPI00025512	Heat shock protein beta-1	HSPB1	1.2	0.684932	0.942466
R.LFDQAFGLPR.L [27, 36] (rank 3)	IPI00025512	Heat shock protein beta-1	HSPB1	0.93	0.833333	0.881667
K.DGVVEITGK.H [114, 122] (rank 4)	IPI00025512	Heat shock protein beta-1	HSPB1	0.83	0.877193	0.853596
K.DGVVEITGK.H [114, 122] (rank 4)	IPI00025512	Heat shock protein beta-1	HSPB1	0.78	0.704225	0.742113	0.874711	0.0850132	0.09719
R.YLEAGAAGLR.W [198, 207] (rank 1)	IPI00100748	highly similar to Hsp70-binding protein 1	HSPBP1	1.35	1.96078	1.65539
K.LLQTCFSSPADDSMDR.- [389, 404] (rank 2)	IPI00100748	highly similar to Hsp70-binding protein 1	HSPBP1	2.07	1.38889	1.72944	1.69242	0.0523629	0.0309397
R.SYGNSSDSR.Y [50, 58] (rank 2)	IPI00428100	Selenoprotein K	HSPC030	5	2.5	3.75
R.HPSTNSLLR.E [32, 40] (rank 1)	IPI00023064	NADH dehydrogenase [ubiquinone] 1 alpha subcomplex assembly factor 4	HSPC125	1.5	0.584795	1.0424
R.EQISLYPEVK.G [41, 50] (rank 2)	IPI00023064	NADH dehydrogenase [ubiquinone] 1 alpha subcomplex assembly factor 4	HSPC125	1.54	0.518135	1.02907	1.03573	0.00942595	0.00910076
K.CEFQDAYVLLSEK.K [236, 248] (rank 2)	IPI00784154	60 kDa heat shock protein, mitochondrial	HSPD1	1.14	0.900901	1.02045
R.KPLVIIAEDVDGEALSTLVLNR.L [268, 289] (rank 1)	IPI00784154	60 kDa heat shock protein, mitochondrial	HSPD1	1.87	1.81818	1.84409
K.DMAIATGGAVFGEEGLTLNLEDVQPHDLGK.V [314, 343] (rank 4)	IPI00784154	60 kDa heat shock protein, mitochondrial	HSPD1	0.97	1.1236	1.0468
K.NAGVEGSLIVEK.I [481, 492] (rank 3)	IPI00784154	60 kDa heat shock protein, mitochondrial	HSPD1	1.15	0.980392	1.0652	1.24413	0.400393	0.321824
K.VGEVIVTK.D [29, 36] (rank 4)	IPI00076042	Short heat shock protein 60 Hsp60s2	HSPD1	0.92	1.28205	1.10103
K.DDAMLLK.G [37, 43] (rank 2)	IPI00076042	Short heat shock protein 60 Hsp60s2	HSPD1	1.27	0.75188	1.01094
R.VTDALNATR.A [105, 113] (rank 3)	IPI00076042	Short heat shock protein 60 Hsp60s2	HSPD1	1.02	1.04167	1.03083
R.CIPALDSLTPANEDQK.I [131, 146] (rank 1)	IPI00076042	Short heat shock protein 60 Hsp60s2	HSPD1	1.33	0.819672	1.07484	1.05441	0.0409705	0.0388564
K.VLLPEYGGTK.V [70, 79] (rank 1)	IPI00220362	10 kDa heat shock protein, mitochondrial	HSPE1	0.96	0.746269	0.853134
R.AEAGSGGPGFTFTFR.S [82, 96] (rank 1)	IPI00220362	10 kDa heat shock protein, mitochondrial	HSPE1	0.85	0.591716	0.720858	0.786996	0.0935335	0.118849
K.NQQITHANNTVSNFK.R [53, 67] (rank 2)	IPI00218993	Isoform Beta of Heat shock protein 105 kDa	HSPH1	1.07	2.08333	1.57667				Average RSD
K.VEDVSAVEIVGGATR.I [331, 345] (rank 1)	IPI00218993	Isoform Beta of Heat shock protein 105 kDa	HSPH1	1.43	1.1236	1.2768	1.42673	0.212039	0.148619	0.146327
